# Supplementary material for: Enhanced crystallization kinetics of poly(lactide) with oxalamide compounds as nucleators: effect of spacer length between the oxalamide moieties
Source: Royal Society of Chemistry journal article supplement (doi:10.1039/c6ra04050k), 2016-01-01
Supplement: c6ra04050k1.pdf [file c6ra04050k1.pdf]

Supporting Information:

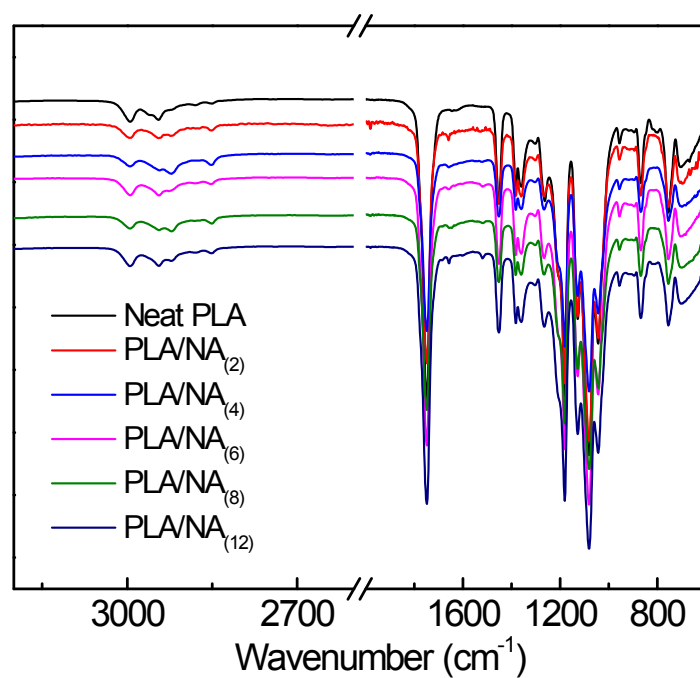

Figure S1. FT-IR spectra of PLA and PLA/NA<sub>(n)</sub> blends.

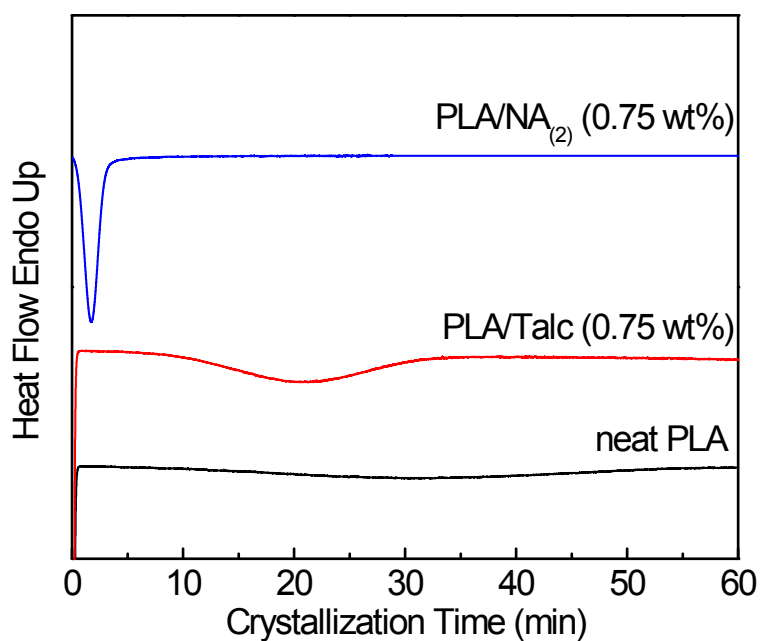

Figure S2. The DSC exothermal curves of PLA, PLA/talc and PLA/NA<sub>(2)</sub> isothermally crystallized at 135 °C.

Table S1. The C=O stretching band of PLA chains in the PLA and PLA/NA<sub>(n)</sub> samples.

| Samples                | C=O stretching vibration (cm <sup>-1</sup> ) |
|------------------------|----------------------------------------------|
| PLA                    | 1748.1                                       |
| PLA/NA <sub>(2)</sub>  | 1747.6                                       |
| PLA/NA <sub>(4)</sub>  | 1747.8                                       |
| PLA/NA <sub>(6)</sub>  | 1748.0                                       |
| PLA/NA <sub>(8)</sub>  | 1747.9                                       |
| PLA/NA <sub>(12)</sub> | 1747.9                                       |
